# Supplementary material for: PacC and pH–dependent transcriptome of the mycotrophic fungus Trichoderma virens
Source: PubMed Central journal article supplement (PMC3618310; doi:10.1186/1471-2164-14-138), 2013-02-28
Supplement: 1471-2164-14-138-S1.pdf [file 1471-2164-14-138-S1.pdf]

## Additional file 1 - List of primers not included in Tables 1 and 2

The primers listed here are referred to in the text. Degenerate primers, gene-specific primers (GSP) and adaptors were used to clone and sequence *pacC* prior to release of the genome sequence. Actin primers were used for normalization (housekeeping gene); “standard” primers were used in construction and validation of transformants. In the degenerate primers, I indicates inosine.

| Comments                      | Primer            | Sequence                                               |
|-------------------------------|-------------------|--------------------------------------------------------|
| <i>pacC</i> degenerate primer | PacFout           | GA(C/T) GA(C/T) III GTN (T/C)TI GTN CGN CC             |
|                               | PacFnest          | AA(A/G) CGN CGN CA(A/G) (T/A)TI GA(C/T) CC             |
|                               | PacRout           | T NCC NCC III (A/G)TA NCG NCG NCG                      |
|                               | PacRnest          | TT (T/C)TC (A/G)TA IAT NGT (A/G)TC (C/T)TG CAT (C/T)TG |
| GSP1 3' flank                 | 3pacC_out         | TCC CTG CTC CCT CTT CAC AAT GCT CTT                    |
| GSP2 3' flank                 | 3pacC_nest        | CAG TAC TAT TTG CCT ATG CCG AAT GCG A                  |
| GSP1 5' flank                 | 5pacC_nest        | CGATCTGAGCATAGGAAGTCGGATC                              |
| GSP2 5' flank                 | 5pacC_out         | TCGGTTGGGGAAAGTAAGATTTCAGT                             |
| Adaptor Primer 1              | AP1               | GTAATACGACTCACTATAGGGC                                 |
| Nested Adaptor Primer 2       | AP2               | ACTATAGGGCACGCGTGGT                                    |
| <i>T. virens</i> actin s      | TVact_s           | GTCAGGTCATCACCATCGGCAACG                               |
| <i>T. virens</i> actin as     | TVact_as          | GCTGGAAGGTGGACAGGGAGGC                                 |
| Standards                     | M13reverse        | GGAAACAGCTATGACCATG                                    |
|                               | M13-(20)forward   | TGTAAAACGACGGCCAGT                                     |
|                               | P <sub>trpC</sub> | GGTCGTTCACTTACCTTGCTTG                                 |
|                               | T <sub>trpC</sub> | GGTGTTCAGGATCTCGATAAG                                  |
