# Supplementary material for: PacC and pH–dependent transcriptome of the mycotrophic fungus Trichoderma virens
Source: PubMed Central journal article supplement (PMC3618310; doi:10.1186/1471-2164-14-138), 2013-02-28
Supplement: 1471-2164-14-138-S2.pdf [file 1471-2164-14-138-S2.pdf]

**Additional file 2 – Alignment of PacC protein from *T. virens* IMI 304061 and *T. virens* Gv29.8, the published reference strain.**

The alignment was generated using ClustalW (<http://www.ebi.ac.uk/Tools/msa/clustalw2/>), default ClustalW colors are shown, indicating amino acid physicochemical properties.

```

IMI      MSAQVPDQAALSPSHDTKSASPTDASSTSPNGSTSNNGSSASSNAQVSPSLGDAIDAPR 60
Gv29.8   MSAQVPDQAALSPSHDTKSASPTDASSTSPNGSTSNNGSSASSNAQVSPSLGDAIDAPR 60
*****

IMI      QLVCRWNQCGQKFTNAETLYEHICERHVGRKSTNNLSLTCQWNSCRTTIVKRDHITSHIR 120
Gv29.8   QLVCRWNQCGQKFTNAETLYEHICERHVGRKSTNNLSLTCQWNSCRTTIVKRDHITSHIR 120
*****

IMI      VHVPLKPHKCEFCEGKSFKRPQDLKKHVKTHADDSVLSRPGQDSQPGMNYRPQAPKPPSY 180
Gv29.8   VHVPLKPHKCEFCEGKSFKRPQDLKKHVKTHADDSVLSRPGQDSQPGMNYRPQAPKPPSY 180
*****

IMI      DHNGQMRSPVTGFFPQPHAGGYAPQPSTNYGLYFNQQHVNPAAPRTEHIGYSASYDRKRTQ 240
Gv29.8   DHNGQMRSPVTGFFPQPHAGGYAPQPSTNYGLYFNQQHVNPAAPRTEHIGYSASYDRKRTQ 240
*****

IMI      AHEMVDDFFGSAKRRQIDPTSYAQIGRSLPLHNLAMPSPMAATESYFPQPIGHAVGH 300
Gv29.8   AHEMVDDFFGSAKRRQIDPTSYAQIGRSLPLHNLAMPSPMAATESYFPQPIGHAVGH 300
*****

IMI      AVVHAAPAPPTQNPLAQYYLPMPNARTQKDLIQLDQMLGQMQDTVYETAPQITAGMHP 360
Gv29.8   GVVHAAPAPPTQNPLAQYYLPMPNARTQKDLIQLDQMLGQMQDTVYETAPQITAGMHP 360
*****

IMI      HDSQFAGYRSTPSPTTLHRGPGAMHVAPDGYHQPVSAANMASPLTAISSTGTPAVTPPSS 420
Gv29.8   HDSQFAGYRSTPSPTTLHRGPGAMHVAPDGYHQPVSAANMASPLTAISSTGTPAVTPPSS 420
*****

IMI      ALSYTSGHSPSPSASSGFSPQSRHSSTASSIMYPSLPTSLPAVSQGFQSTTATLGPSFD 480
Gv29.8   ALSYTSGHSPSPSASSGFSPQSRHSSTASSIMYPSLPTSLPAVSQGFQSTTATLGPSFD 480
*****

IMI      AGERRRYSGGMLQRARGAPPRSVVEEPPSGAVTPKASESTPPIGSPSSESSDVS DATRERE 540
Gv29.8   AGERRRYSGGMLQRARGAPPRSVVEEPPSGAVTPKASESTPPIGSPSSESSDVS DATRERE 540
*****

IMI      QYDRWVDNMRVIEALREYVQGRLLKRGFEQEYPSVNRIRKDV DAMDLEGKRSPLANERP 600
Gv29.8   QYDRWVDNMRVIEALREYVQGRLLKRGFEQEYPSVNRIRKDV DAMDLEGKRSPLANERP 600
*****

IMI      MSKESNPLYVLPVPGT 617
Gv29.8   MSKESNPLYVLPVPGT 617
*****

```
