# Supplementary material for: PacC and pH–dependent transcriptome of the mycotrophic fungus Trichoderma virens
Source: PubMed Central journal article supplement (PMC3618310; doi:10.1186/1471-2164-14-138), 2013-02-28

#### Additional file 4- split-marker gene replacement strategy.

In the first round of PCR reactions, the flanking regions are amplified; in the second round, they are each fused to part of the hygromycin resistance cassette (HYG). For primer sequences see Additional File 14; the strategy and diagram are adapted from [46].

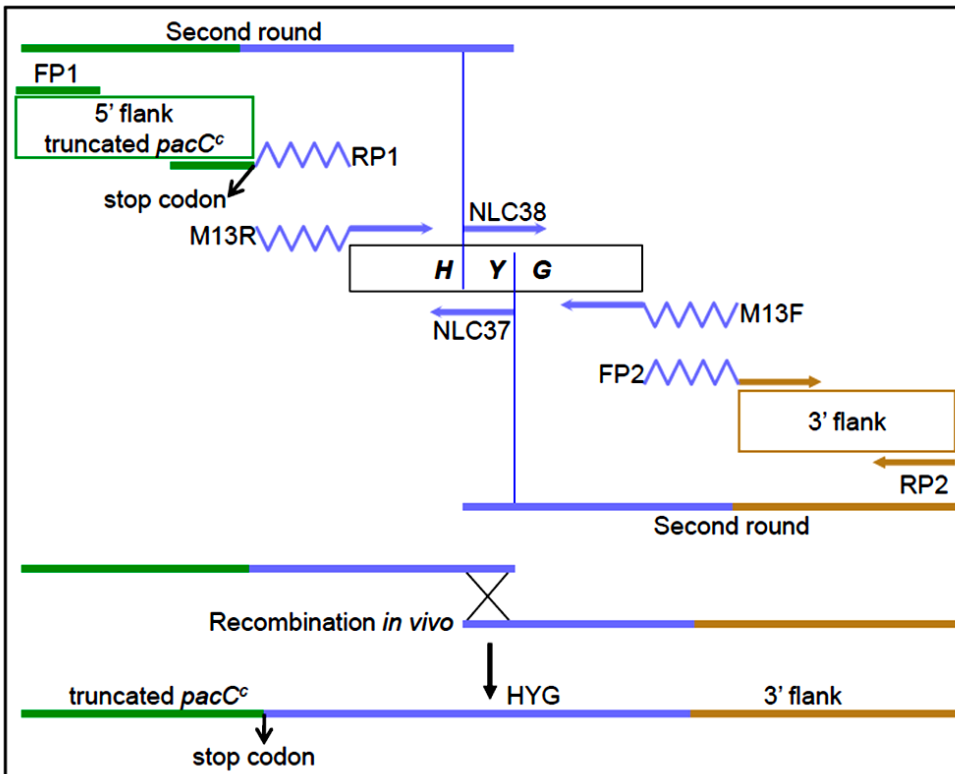

Supplement: 1471-2164-14-138-S4.pdf [file 1471-2164-14-138-S4.pdf]
