# Supplementary material for: PacC and pH–dependent transcriptome of the mycotrophic fungus Trichoderma virens
Source: PubMed Central journal article supplement (PMC3618310; doi:10.1186/1471-2164-14-138), 2013-02-28
Supplement: 1471-2164-14-138-S7.pdf [file 1471-2164-14-138-S7.pdf]

### Additional file 7 - Lists of differentially expressed genes from statistical analysis (Figure 5).

The numbers indicate protein ID number according to v1.0 of the *T. virens* genome assembly (<http://genome.jgi-psf.org/cgi-bin/searchGM?db=Trive1>).

| wt pH 8 > wt pH 4 |       |       |       |       |       |       |        |
|-------------------|-------|-------|-------|-------|-------|-------|--------|
| 62                | 23818 | 34210 | 44694 | 54160 | 63359 | 69787 | 79870  |
| 1583              | 23882 | 34248 | 44767 | 54245 | 64085 | 69800 | 79910  |
| 1598              | 24467 | 34285 | 44988 | 54471 | 64683 | 69813 | 80742  |
| 3912              | 26112 | 34473 | 45536 | 54659 | 64807 | 69821 | 80915  |
| 4594              | 27509 | 34514 | 45839 | 55670 | 64898 | 70125 | 80945  |
| 4916              | 28147 | 34827 | 46709 | 55713 | 64973 | 70206 | 81436  |
| 5073              | 28324 | 34872 | 46845 | 55793 | 65182 | 70300 | 81599  |
| 5637              | 28471 | 34908 | 46854 | 55818 | 65685 | 70450 | 81610  |
| 6309              | 28878 | 34950 | 46884 | 55945 | 65771 | 70657 | 81799  |
| 6352              | 29548 | 35100 | 46953 | 55997 | 66038 | 71019 | 82077  |
| 6898              | 29930 | 36320 | 47014 | 56058 | 66104 | 71022 | 82108  |
| 7366              | 30062 | 36493 | 47075 | 56118 | 66108 | 71023 | 82861  |
| 7406              | 30165 | 37069 | 47845 | 56294 | 66166 | 71270 | 83512  |
| 7723              | 30424 | 37111 | 47993 | 56547 | 66191 | 72203 | 84367  |
| 9444              | 30456 | 37740 | 49202 | 57290 | 66318 | 72350 | 84899  |
| 9562              | 30642 | 39063 | 49318 | 57481 | 66361 | 72478 | 85436  |
| 10799             | 30803 | 39685 | 49577 | 57790 | 66408 | 72547 | 85586  |
| 12255             | 31296 | 40391 | 49609 | 57864 | 66794 | 72673 | 86068  |
| 13146             | 31434 | 40784 | 49612 | 57880 | 66997 | 73234 | 86342  |
| 13221             | 31493 | 40829 | 49743 | 58008 | 67017 | 73257 | 86628  |
| 13611             | 31547 | 41088 | 49802 | 58111 | 67287 | 74348 | 86768  |
| 13820             | 31991 | 41593 | 49814 | 58166 | 67292 | 74393 | 87478  |
| 14412             | 32043 | 42016 | 50275 | 58169 | 67578 | 74715 | 87714  |
| 15079             | 32256 | 42239 | 50684 | 58256 | 67658 | 74722 | 88342  |
| 15416             | 32491 | 42564 | 51057 | 58340 | 67662 | 74915 | 88464  |
| 16120             | 32828 | 42568 | 51254 | 58634 | 67726 | 75374 | 88928  |
| 17086             | 32911 | 43455 | 51356 | 58793 | 67727 | 75759 | 89677  |
| 17565             | 32928 | 43564 | 51758 | 59177 | 67729 | 75793 | 89827  |
| 17916             | 32971 | 43674 | 51804 | 59860 | 67934 | 75976 | 91051  |
| 17934             | 33332 | 43724 | 51830 | 60268 | 68007 | 76182 | 91506  |
| 18141             | 33558 | 43815 | 51890 | 60434 | 68086 | 76487 | 91616  |
| 18327             | 33563 | 43838 | 51892 | 60578 | 68115 | 76620 | 91759  |
| 18378             | 33666 | 43901 | 51932 | 61062 | 68116 | 76718 | 92317  |
| 19142             | 33795 | 44039 | 51974 | 61173 | 68342 | 76948 | 92458  |
| 19266             | 33825 | 44141 | 53249 | 61203 | 68453 | 77023 | 92847  |
| 19331             | 33937 | 44194 | 53282 | 61853 | 68745 | 78116 | 110727 |
| 21063             | 34037 | 44199 | 53367 | 62353 | 69228 | 78136 | 110873 |
| 22482             | 34056 | 44273 | 53416 | 62483 | 69284 | 79195 | 110893 |
| 23185             | 34120 | 44392 | 53528 | 62839 | 69374 | 79277 | 111691 |
| 23200             | 34162 | 44490 | 54060 | 62940 | 69456 | 79497 | 111897 |
|                   |       |       |       |       |       |       | 111979 |

  

| wt pH 8 > wt pH 4 and wt pH 8 > $\Delta pacC$ pH 8 |       |       |       |       |       |       |       |
|----------------------------------------------------|-------|-------|-------|-------|-------|-------|-------|
| 62                                                 | 28324 | 34827 | 51804 | 58008 | 66794 | 74348 | 80915 |
| 1583                                               | 28471 | 34950 | 51974 | 58111 | 67287 | 74915 | 85436 |
| 5073                                               | 28878 | 37069 | 53416 | 58340 | 67662 | 75759 | 85586 |
| 5637                                               | 31296 | 39685 | 54160 | 60268 | 68086 | 76487 | 86342 |

|       |       |       |       |       |       |       |        |
|-------|-------|-------|-------|-------|-------|-------|--------|
| 6898  | 32256 | 40391 | 54471 | 61173 | 69284 | 76620 | 88464  |
| 10799 | 32491 | 42239 | 55713 | 61853 | 69374 | 76948 | 88928  |
| 13820 | 33666 | 42568 | 55793 | 62353 | 70125 | 77023 | 89677  |
| 16120 | 33937 | 43815 | 55945 | 62940 | 71270 | 78136 | 91616  |
| 18327 | 34037 | 44039 | 55997 | 64085 | 72203 | 79497 | 111897 |
| 21063 | 34210 | 47075 | 56118 | 65182 | 72350 | 79870 |        |
| 27509 | 34248 | 47845 | 56294 | 66038 | 72673 | 79910 |        |
| 28147 | 34514 | 49577 | 57790 | 66108 | 73257 | 80742 |        |

wt pH 8 > wt pH 4 and wt pH 8 >  $\Delta pacC$  pH 8 and  
 $\Delta pacC$  pH 8 =  $\Delta pacC$  pH 4 and wt pH 4  $\geq$   $\Delta pacC$  pH 4

|       |       |       |       |       |       |       |        |
|-------|-------|-------|-------|-------|-------|-------|--------|
| 62    | 28324 | 34514 | 47845 | 57790 | 66108 | 73257 | 86342  |
| 1583  | 28471 | 34827 | 51974 | 58008 | 67287 | 74348 | 88464  |
| 5073  | 28878 | 34950 | 53416 | 58111 | 67662 | 75759 | 89677  |
| 5637  | 31296 | 37069 | 54160 | 58340 | 68086 | 76487 | 111897 |
| 6898  | 32256 | 39685 | 54471 | 60268 | 69284 | 76620 |        |
| 10799 | 32491 | 40391 | 55713 | 61173 | 69374 | 76948 |        |
| 13820 | 33666 | 42239 | 55945 | 61853 | 70125 | 77023 |        |
| 21063 | 33937 | 42568 | 55997 | 62353 | 71270 | 78136 |        |
| 27509 | 34037 | 43815 | 56118 | 64085 | 72203 | 79870 |        |
| 28147 | 34248 | 47075 | 56294 | 65182 | 72673 | 80915 |        |

wt pH 8 > wt pH 4 and wt pH 8 >  $\Delta pacC$  pH 8 and  $\Delta pacC$  pH 8 >  $\Delta pacC$  pH 4

|       |       |       |       |       |       |       |       |
|-------|-------|-------|-------|-------|-------|-------|-------|
| 16120 | 49577 | 55793 | 66038 | 72350 | 79497 | 85436 | 91616 |
| 18327 | 51804 | 62940 | 66794 | 74915 | 79910 | 88928 |       |

wt pH 8 > wt pH 4 and wt pH 8 >  $\Delta pacC$  pH 8 and wt pH 4 >  $\Delta pacC$  pH 4

|       |       |       |       |       |       |       |       |
|-------|-------|-------|-------|-------|-------|-------|-------|
| 18327 | 33666 | 33937 | 40391 | 66108 | 74915 | 79497 | 85436 |
|-------|-------|-------|-------|-------|-------|-------|-------|

wt pH 8 < wt pH 4

|       |       |       |       |       |       |       |       |
|-------|-------|-------|-------|-------|-------|-------|-------|
| 49    | 31415 | 44387 | 52534 | 61140 | 69509 | 78714 | 86314 |
| 1402  | 31473 | 44709 | 52801 | 61437 | 69626 | 78735 | 86397 |
| 1900  | 31655 | 45164 | 52839 | 61596 | 69842 | 78759 | 86792 |
| 2224  | 31892 | 45299 | 52876 | 61788 | 70229 | 79145 | 86828 |
| 3262  | 32650 | 45391 | 52981 | 61957 | 70389 | 79303 | 87170 |
| 4165  | 32837 | 45407 | 53225 | 62266 | 70542 | 79337 | 87711 |
| 4561  | 32844 | 45560 | 53228 | 62289 | 71204 | 79354 | 87721 |
| 4744  | 32952 | 45768 | 53370 | 62497 | 71429 | 79625 | 88246 |
| 5211  | 32969 | 45779 | 53581 | 62502 | 71577 | 79679 | 88285 |
| 6421  | 33397 | 45894 | 53582 | 62590 | 71692 | 79681 | 88374 |
| 8279  | 33658 | 46143 | 53730 | 62656 | 71997 | 79823 | 88538 |
| 8451  | 33927 | 46411 | 54100 | 62665 | 72390 | 80215 | 88881 |
| 8690  | 34363 | 46453 | 54531 | 62683 | 72446 | 80284 | 88883 |
| 10390 | 34822 | 46500 | 54747 | 62760 | 72458 | 80526 | 89165 |
| 12616 | 34877 | 46596 | 54997 | 62870 | 72860 | 80583 | 89424 |
| 13148 | 34881 | 46639 | 55211 | 63140 | 73176 | 80591 | 89738 |
| 13236 | 35984 | 46824 | 55675 | 63496 | 73483 | 80929 | 89740 |
| 13994 | 36112 | 46990 | 55747 | 63835 | 73504 | 81170 | 89941 |
| 14736 | 36187 | 47116 | 55803 | 63940 | 73591 | 81561 | 91002 |
| 14863 | 36701 | 47120 | 55809 | 64335 | 73622 | 81710 | 91256 |
| 15214 | 37118 | 47152 | 55825 | 64534 | 73671 | 81735 | 91258 |
| 15665 | 37142 | 47770 | 56771 | 64838 | 73922 | 81832 | 91753 |
| 16988 | 37216 | 47789 | 57212 | 64931 | 74289 | 81869 | 92044 |
| 17064 | 37560 | 47998 | 57354 | 65142 | 74291 | 81957 | 92048 |

|       |       |       |       |       |       |       |        |
|-------|-------|-------|-------|-------|-------|-------|--------|
| 18652 | 38104 | 48079 | 57476 | 65382 | 74397 | 82134 | 92112  |
| 19422 | 38198 | 48261 | 57871 | 65436 | 74792 | 82254 | 92435  |
| 21187 | 38237 | 48610 | 58016 | 65978 | 74836 | 82486 | 92614  |
| 22298 | 38517 | 48794 | 58191 | 65980 | 75173 | 82546 | 92648  |
| 23422 | 39626 | 49873 | 58221 | 66237 | 75241 | 82626 | 92958  |
| 26720 | 39703 | 49894 | 58255 | 66295 | 75395 | 82648 | 110548 |
| 27962 | 39763 | 49896 | 58320 | 66558 | 75728 | 82975 | 110616 |
| 28241 | 40073 | 50212 | 58356 | 67765 | 75806 | 83020 | 110789 |
| 28425 | 40076 | 50413 | 58495 | 67871 | 76008 | 83056 | 110799 |
| 28884 | 40373 | 50552 | 58538 | 68002 | 76647 | 83099 | 111175 |
| 29072 | 40635 | 50578 | 58567 | 68122 | 76953 | 83793 | 111364 |
| 29306 | 41159 | 50666 | 58597 | 68271 | 77102 | 84263 | 111431 |
| 29650 | 41165 | 50865 | 58728 | 69068 | 77460 | 84449 | 111460 |
| 29667 | 41304 | 50949 | 59067 | 69133 | 77465 | 84563 | 111469 |
| 29738 | 41337 | 51050 | 59188 | 69135 | 77579 | 84951 | 111830 |
| 29941 | 43330 | 51083 | 59343 | 69222 | 77829 | 85675 | 111832 |
| 30396 | 43385 | 51305 | 59538 | 69343 | 78031 | 85743 | 111853 |
| 30786 | 43673 | 51849 | 60797 | 69429 | 78069 | 86235 | 111957 |
| 31390 | 44127 | 52018 | 60819 | 69432 | 78413 | 86266 | 111966 |

wt pH 8 < wt pH 4 and wt pH 8 <  $\Delta pacC$  pH 8

|       |       |       |       |       |       |       |        |
|-------|-------|-------|-------|-------|-------|-------|--------|
| 1900  | 31415 | 45164 | 53370 | 58255 | 68271 | 78759 | 86792  |
| 3262  | 34822 | 45768 | 53581 | 58495 | 69429 | 79145 | 88246  |
| 13148 | 34877 | 46411 | 53582 | 59538 | 69432 | 81869 | 88285  |
| 22298 | 36701 | 47770 | 53730 | 62266 | 71577 | 81957 | 89738  |
| 23422 | 37142 | 48610 | 55803 | 62665 | 72390 | 82648 | 89740  |
| 28425 | 40076 | 49894 | 55825 | 62760 | 72458 | 83793 | 92435  |
| 28884 | 40635 | 51083 | 58016 | 63496 | 75173 | 85675 | 111431 |
| 29072 | 44387 | 52534 | 58191 | 64931 | 77460 | 85743 | 111460 |

wt pH 8 < wt pH 4 and wt pH 8 <  $\Delta pacC$  pH 8 and  
 $\Delta pacC$  pH 8 =  $\Delta pacC$  pH 4 and wt pH 4  $\leq$   $\Delta pacC$  pH 4

|       |       |       |       |       |       |       |        |
|-------|-------|-------|-------|-------|-------|-------|--------|
| 3262  | 34877 | 46411 | 53370 | 59538 | 69429 | 81869 | 89738  |
| 22298 | 36701 | 47770 | 55803 | 62266 | 69432 | 82648 | 89740  |
| 23422 | 40076 | 48610 | 55825 | 62665 | 72458 | 83793 | 111431 |
| 28425 | 40635 | 49894 | 58016 | 63496 | 75173 | 85675 | 111460 |
| 28884 | 45164 | 51083 | 58191 | 64931 | 77460 | 86792 |        |
| 31415 | 45768 | 52534 | 58255 | 68271 | 78759 | 88285 |        |

wt pH 8 < wt pH 4 and wt pH 8 <  $\Delta pacC$  pH 8 and  $\Delta pacC$  pH 8 <  $\Delta pacC$  pH 4

|       |       |       |       |       |       |       |       |
|-------|-------|-------|-------|-------|-------|-------|-------|
| 13148 | 37142 | 53581 | 53730 | 62760 | 72390 | 81957 | 88246 |
| 34822 | 44387 | 53582 | 58495 | 71577 | 79145 | 85743 | 92435 |

wt pH 8 < wt pH 4 and wt pH 8 <  $\Delta pacC$  pH 8 and wt pH 4 <  $\Delta pacC$  pH 4

|       |       |       |       |       |       |       |  |
|-------|-------|-------|-------|-------|-------|-------|--|
| 13148 | 37142 | 52534 | 53730 | 78759 | 85675 | 89740 |  |
| 34822 | 48610 | 53581 | 69432 | 79145 | 85743 | 92435 |  |
| 36701 | 49894 | 53582 | 72458 | 82648 | 88246 |       |  |
