# Supplementary material for: PacC and pH–dependent transcriptome of the mycotrophic fungus Trichoderma virens
Source: PubMed Central journal article supplement (PMC3618310; doi:10.1186/1471-2164-14-138), 2013-02-28
Supplement: 1471-2164-14-138-S8.pdf [file 1471-2164-14-138-S8.pdf]

**Additional file 9 - Expression profiles of PacC-dependent, alkaline pH upregulated genes, and available annotation.** Secreted proteins are indicated by a + if predicted at a SignalP score of at least 0.7. The number of predicted PacC binding sites (GCCARG, see text) in the 1 kb region upstream of the start codon is given in the last column. Expression profiles (fold expression at pH 8 compared to pH 4, and wt compared to  $\Delta pacC$  at pH 8) are given. Annotation by homology: entries are best hits by BLAST, E values are given in the following column.

| Protein ID | SignalP | Annotation by homology                                                                             | E value   | Fold wt8/wt4 | Fold wt8/ $\Delta pacC8$ | number of binding sites |
|------------|---------|----------------------------------------------------------------------------------------------------|-----------|--------------|--------------------------|-------------------------|
| 1583       |         | fungal specific transcription factor [ <i>Colletotrichum higginsianum</i> ]                        | 0         | 5            | 3                        | 3                       |
| 5073       |         | hypothetical protein                                                                               |           | 15           | 78                       | 2                       |
| 5637       |         | hypothetical protein                                                                               |           | 4            | 4                        | 2                       |
| 6898       |         | mannosylphosphate transferase [ <i>Grosmannia clavigera</i> kw1407]                                | 4.00E-98  | 16           | 37                       | 4                       |
| 10799      | +       | putative Na <sup>+</sup> /H <sup>+</sup> antiporter CNH1 [ <i>Metarhizium anisopliae</i> ARSEF 23] | 0         | 9            | 9                        | 2                       |
| 13820      |         | eukaryotic aspartyl protease [ <i>Glomerella graminicola</i> M1.001]                               | 4.00E-142 | 5            | 2                        | 5                       |
| 16120      |         |                                                                                                    |           | 4            | 2                        | 1                       |
| 18327      |         | ribonuclease Trv [ <i>Verticillium albo-atrum</i> VaMs.102]                                        | 6.00E-126 | 63           | 48                       | 3                       |
| 21063      | +       | DNA repair protein rad5 [ <i>Pyrenophora tritici-repentis</i> Pt-1C-BFP]                           | 2.00E-66  | 10           | 7                        | 1                       |
| 27509      |         | cyanovirin-N [ <i>Aspergillus niger</i> CBS 513.88]                                                | 9.00E-08  | 14           | 24                       | 4                       |
| 28147      |         | hypothetical protein                                                                               |           | 2.2E+04      | 4.6E+04                  | 3                       |
| 28324      |         | related to DNA damage-responsive protein 48 [ <i>Piriformospora indica</i> DSM 11827]              | 1.00E-29  | 8            | 3                        | 5                       |
| 28471      |         | glycoside hydrolase family 76 protein [ <i>Trichoderma virens</i> Gv29-8]                          | 0         | 3            | 3                        | 3                       |
| 28878      |         | alcohol dehydrogenase [ <i>Aspergillus oryzae</i> RIB40]                                           | 2.00E-88  | 4            | 4                        | 3                       |
| 31296      |         | DNA/RNA helicase [ <i>Grosmannia clavigera</i> kw1407]                                             | 7.00E-67  | 4            | 6                        | 2                       |
| 32256      |         | MFS transporter [ <i>Metarhizium acridum</i> CQMa 102]                                             | 0         | 8            | 4                        | 3                       |
| 32491      | +       | glutathione-dependent formaldehyde-activating enzyme [ <i>Glomerella graminicola</i> M1.001]       | 2.00E-51  | 3            | 7                        | 2                       |
| 33666      | +       | GDP-fucose transporter-like protein [ <i>Trichoderma atroviride</i> IMI 206040]                    | 7.00E-154 | 31           | 6.8E+02                  | 2                       |
| 33937      | +       | pyruvyltransferase [ <i>Schizosaccharomyces japonicus</i> yFS275]                                  | 1.00E-44  | 24           | 58                       | 0                       |
| 34037      |         | similar to MFS multidrug transporter [ <i>Botryotinia fuckeliana</i> ]                             | 1.00E-111 | 5            | 2                        | 1                       |
| 34210      |         |                                                                                                    |           | 9            | 2                        | 2                       |
| 34248      |         | betaine aldehyde dehydrogenase [ <i>Metarhizium anisopliae</i> ARSEF 23]                           | 0         | 58           | 3                        | 2                       |
| 34514      |         | C4-dicarboxylate transporter/malic acid transporter [ <i>Glomerella graminicola</i> M1.001]        | 0         | 47           | 47                       | 6                       |
| 34827      |         | cation transporting ATPase [ <i>Trichoderma virens</i> Gv29-8]                                     | 0         | 2.0E+03      | 8.3E+02                  | 8                       |
| 34950      |         | hypothetical protein                                                                               |           | 6.7E+03      | 1.3E+07                  | 0                       |
| 37069      |         | GNAT family acetyltransferase, putative [ <i>Metarhizium anisopliae</i> ARSEF 23]                  | 3.00E-133 | 6            | 2                        | 3                       |

|       |   |                                                                                                |           |         |         |   |
|-------|---|------------------------------------------------------------------------------------------------|-----------|---------|---------|---|
| 39685 |   | SPFH domain/Band 7 family protein [ <i>Glomerella graminicola</i> M1.001]                      | 0         | 8       | 2       | 2 |
| 40391 |   | transcription factor PacC [ <i>Hypocrea lixii</i> ]                                            | 0         | 27      | 3.5E+08 | 9 |
| 42239 | + | calcineurin-like phosphoesterase, putative [ <i>Metarhizium acridum</i> CQMa 102]              | 0         | 3       | 3       | 3 |
| 42568 |   | glutathione S-transferase [ <i>Neurospora tetrasperma</i> FGSC 2509]                           | 3.00E-07  | 7       | 5       | 3 |
| 43815 |   | glycosyltransferase [ <i>Trichoderma reesei</i> QM6a]                                          | 0         | 2       | 2       | 2 |
| 44039 |   |                                                                                                |           | 10      | 2       | 3 |
| 47075 |   | arginine deiminase type-3 [ <i>Metarhizium anisopliae</i> ARSEF 23]                            | 0         | 1.2E+02 | 22      | 2 |
| 47845 | + | srpk, putative [ <i>Metarhizium anisopliae</i> ARSEF 23]                                       | 3.00E-49  | 20      | 9       | 6 |
| 49577 | + | hypothetical protein                                                                           |           | 80      | 6       | 2 |
| 51804 |   |                                                                                                |           | 23      | 3       | 4 |
| 51974 | + | hypothetical protein                                                                           |           | 5       | 6.5E+06 | 4 |
| 53416 |   | hypothetical protein                                                                           |           | 38      | 12      | 3 |
| 54160 | + | ribonuclease T2 precursor [ <i>Cordyceps militaris</i> CM01]                                   | 7.00E-171 | 2       | 2       | 2 |
| 54471 |   | Thioredoxin-(TRX) like protein [ <i>Cupriavidus metallidurans</i> CH34]                        | 9.00E-54  | 5       | 18      | 2 |
| 55713 |   | HpcH/Hpal aldolase/citrate lyase family protein [ <i>Colletotrichum higginsianum</i> ]         | 6.00E-102 | 6       | 4       | 1 |
| 55793 | + |                                                                                                |           | 3       | 2       | 3 |
| 55945 |   | SNARE-dependent exocytosis protein (Sro7), putative [ <i>Cordyceps militaris</i> CM01]         | 0         | 3       | 4       | 2 |
| 55997 | + | hypothetical protein                                                                           |           | 8       | 3       | 3 |
| 56118 |   | sodium/hydrogen exchanger family protein [ <i>Colletotrichum higginsianum</i> ]                | 5.00E-164 | 3       | 3       | 1 |
| 56294 |   | PX domain protein [ <i>Metarhizium anisopliae</i> ARSEF 23]                                    | 0         | 12      | 4       | 1 |
| 57790 |   | queuine tRNA-ribosyltransferase-like protein [ <i>Chaetomium thermophilum</i> ]                | 9.00E-05  | 3       | 3       | 4 |
| 58008 |   | tagatose-bisphosphate aldolase [ <i>Trichoderma reesei</i> QM6a]                               | 4.00E-73  | 2.1E+03 | 4.8E+03 | 2 |
| 58111 | + | glycoside hydrolase family 76 protein [ <i>Trichoderma virens</i> Gv29-8]                      | 0         | 3.2E+02 | 4.6E+04 | 6 |
| 58340 |   | hypothetical protein                                                                           |           | 3       | 4       | 1 |
| 60268 | + | similar to glutathione-dependent formaldehyde-activating gfa [ <i>Botryotinia fuckeliana</i> ] | 3.00E-13  | 69      | 25      | 1 |
| 61173 |   | AAA family ATPase, putative [ <i>Cordyceps militaris</i> CM01]                                 | 2.00E-30  | 4       | 4       | 3 |
| 61853 | + | heterokaryon incompatibility protein Het-C [ <i>Glomerella graminicola</i> M1.001]             | 0         | 2       | 5       | 6 |
| 62353 |   | hypothetical protein                                                                           |           | 5       | 5       | 1 |
| 62940 | + | WSC domain protein [ <i>Neosartorya fischeri</i> NRRL 181]                                     | 2.00E-62  | 4.3E+02 | 24      | 2 |
| 64085 | + | hypothetical protein                                                                           |           | 3       | 4       | 2 |
| 65182 |   | hypothetical protein                                                                           |           | 5       | 5       | 0 |
| 66038 | + |                                                                                                |           | 8       | 2       | 3 |
| 66108 | + | hypothetical protein                                                                           |           | 3       | 12      | 2 |
| 66794 | + |                                                                                                |           | 4       | 2       | 2 |
| 67287 |   | NADP(+)-dependent dehydrogenase, putative [ <i>Aspergillus clavatus</i> NRRL 1]                | 1.00E-52  | 6       | 2       | 2 |
| 67662 |   | cation transporting ATPase [ <i>Trichoderma virens</i> Gv29-8]                                 | 0         | 4.1E+05 | 3.4E+07 | 3 |
| 68086 | + | related to ZRT2-Zinc transporter II [ <i>Sporisorium reilianum</i> SRZ2]                       | 8.1       | 2.2E+03 | 6.7E+03 | 2 |

|        |   |                                                                                            |           |         |         |   |
|--------|---|--------------------------------------------------------------------------------------------|-----------|---------|---------|---|
| 69284  |   | cation transporting ATPase [ <i>Trichoderma virens</i> Gv29-8]                             | 0         | 3       | 2       | 6 |
| 69374  | + | NACHT and ankyrin domain protein [ <i>Trichoderma virens</i> Gv29-8]                       | 0         | 2       | 2       | 1 |
| 70125  |   | hypothetical protein                                                                       |           | 7       | 48      | 1 |
| 71270  | + | secreted aspartic proteinase [ <i>Hypocrea lixii</i> ]                                     | 0         | 5       | 2       | 3 |
| 72203  |   | fructose-bisphosphatase [ <i>Trichoderma reesei</i> QM6a]                                  | 0         | 2       | 2       | 2 |
| 72350  |   |                                                                                            |           | 3       | 2       | 5 |
| 72673  |   | putative Plasma membrane proteolipid 3 [ <i>Glarea lozoyensis</i> 74030]                   | 7.00E-31  | 1       | 2       | 6 |
| 73257  | + | copper radical oxidase [ <i>Colletotrichum higginsianum</i> ]                              | 0         | 2       | 2       | 2 |
| 74348  | + | putative glyoxal oxidase precursor [ <i>Metarhizium anisopliae</i> ARSEF 23]               | 0         | 5       | 2       | 7 |
| 74915  | + | plasma membrane ATPase [ <i>Trichoderma atroviride</i> IMI 206040]                         | 0         | 5       | 4       | 8 |
| 75759  | + | pH-response regulator protein palC [ <i>Metarhizium acridum</i> CQMa 102]                  | 0         | 12      | 1.8E+02 | 4 |
| 76487  |   | C2 domain containing protein [ <i>Metarhizium anisopliae</i> ARSEF 23]                     | 0         | 5       | 3       | 7 |
| 76620  | + | endonuclease/exonuclease/phosphatase family protein [ <i>Metarhizium acridum</i> CQMa 102] | 0         | 42      | 3.2E+05 | 3 |
| 76948  | + | 5'-nucleotidase precursor [ <i>Metarhizium anisopliae</i> ARSEF 23]                        | 0         | 5       | 7       | 2 |
| 77023  | + | methyltransferase [ <i>Arthroderma otae</i> CBS 113480]                                    | 2.00E-114 | 3.9E+03 | 3.2E+05 | 3 |
| 78136  |   | GNAT family acetyltransferase, putative [ <i>Metarhizium anisopliae</i> ARSEF 23]          | 4.00E-41  | 3       | 2       | 1 |
| 79497  | + | Oligopeptide transporter [ <i>Cordyceps militaris</i> CM01]                                | 0         | 8       | 5       | 6 |
| 79870  |   | vacuolar import and degradation protein [ <i>Verticillium dahliae</i> VdLs.17]             | 0         | 2       | 2       | 3 |
| 79910  |   | carbohydrate-binding module family 50 protein [ <i>Trichoderma virens</i> Gv29-8]          | 6.00E-36  | 8       | 2       | 1 |
| 80742  |   |                                                                                            |           | 3       | 3       | 4 |
| 80915  | + | sodium/phosphate symporter, putative [ <i>Metarhizium acridum</i> CQMa 102]                | 0         | 1.4E+02 | 2.7E+02 | 2 |
| 85436  |   | dicarboxylic amino acid permease [ <i>Metarhizium acridum</i> CQMa 102]                    | 0         | 5       | 3       | 2 |
| 85586  |   |                                                                                            |           | 11      | 3       | 3 |
| 86342  | + | glycoside hydrolase family 47 protein [ <i>Trichoderma virens</i> Gv29-8]                  | 0         | 3       | 3       | 4 |
| 88464  |   | integral membrane protein [ <i>Aspergillus kawachii</i> IFO 4308]                          | 3.00E-70  | 3       | 2       | 2 |
| 88928  | + | putative aspartic endopeptidase [ <i>Hypocrea lixii</i> ]                                  | 0         | 7       | 3       | 2 |
| 89677  | + | ZIP Zinc transporter [ <i>Glomerella graminicola</i> M1.001]                               | 2.00E-145 | 2.6E+02 | 34      | 8 |
| 91616  | + | transaldolase/ glucose-6-phosphate isomerase [ <i>Bradyrhizobiaceae bacterium</i> SG-6C]   | 2.7       | 1.1E+02 | 14      | 3 |
| 111897 | + | Protein kinase-like domain [ <i>Cordyceps militaris</i> CM01]                              | 3.00E-65  | 20      | 34      | 2 |
