# Supplementary material for: PacC and pH–dependent transcriptome of the mycotrophic fungus Trichoderma virens
Source: PubMed Central journal article supplement (PMC3618310; doi:10.1186/1471-2164-14-138), 2013-02-28

**Additional file 8 –Mutants in P type ATPase *ena1* are similar to wt in plate assays for growth and confrontation.** The strains were inoculated on PDA plates photographed at 11 days from above to show overgrowth and sporulation (A) or below to show pH indicator color (B). The wt and  $\Delta ena1$  strains were grown in confrontation with two plant pathogens.

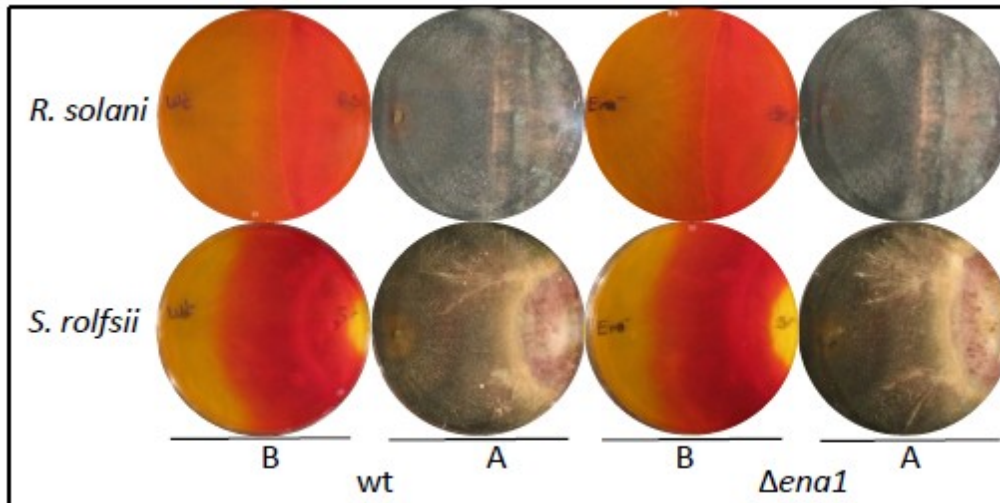

Supplement: 1471-2164-14-138-S9.pdf [file 1471-2164-14-138-S9.pdf]
