# Supplementary material for: PacC and pH–dependent transcriptome of the mycotrophic fungus Trichoderma virens
Source: PubMed Central journal article supplement (PMC3618310; doi:10.1186/1471-2164-14-138), 2013-02-28
Supplement: 1471-2164-14-138-S10.pdf [file 1471-2164-14-138-S10.pdf]

**Additional file 10 - Expression profiles of PacC-dependent, acid pH upregulated genes, and available annotation.** Secreted proteins are indicated by a + if predicted at a SignalP score of at least 0.7. The number of predicted PacC binding sites (GCCARG, see text) in the 1 kb region upstream of the start codon is given in the last column. Expression profiles (fold expression at pH 8 compared to pH 4, and wt compared to  $\Delta pacC$  at pH 8) are given. Annotation by homology: entries are best hits by BLAST, E values are given in the following column.

| TargetID | SignalP | Annotation by homology                                                                        | E value | Fold Wt4/Wt8 | Fold <i>pacC8</i> /Wt8 | number of binding sites |
|----------|---------|-----------------------------------------------------------------------------------------------|---------|--------------|------------------------|-------------------------|
| 1900     | +       |                                                                                               |         | 4            | 3                      | 5                       |
| 3262     | +       | similar to purine-cytosine permease [ <i>Botryotinia fuckeliana</i> ]                         | 0       | 3            | 3                      | 0                       |
| 13148    | +       |                                                                                               |         | 7            | 15                     | 1                       |
| 22298    |         | glycosyltransferase family 31 protein [ <i>Trichoderma virens</i> Gv29-8]                     | 0       | 16           | 39                     | 2                       |
| 23422    | +       | putative P450 monooxygenase [ <i>Mycosphaerella graminicola</i> IPO323]                       | 1E-108  | 4            | 6                      | 0                       |
| 28425    |         | putative family C-like G-protein-coupled receptor [ <i>Trichoderma atroviride</i> IMI 206040] | 5E-171  | 4            | 3                      | 0                       |
| 28884    | +       | predicted small secreted cysteine-rich protein                                                | 1E-118  | 5            | 9                      | 1                       |
| 29072    | +       |                                                                                               |         | 7            | 21                     | 2                       |
| 31415    |         | NADH:flavin oxidoreductase/NADH oxidase [ <i>Trichoderma atroviride</i> IMI 206040]           | 0       | 3            | 4                      | 1                       |
| 34822    |         |                                                                                               |         | 7            | 9                      | 1                       |
| 34877    |         | acyltransferase, putative [ <i>Metarhizium anisopliae</i> ARSEF 23]                           | 0       | 10           | 10                     | 0                       |
| 36701    | +       | aldehyde dehydrogenase [ <i>Aspergillus kawachii</i> IFO 4308]                                | 1E-145  | 2            | 3                      | 0                       |
| 37142    |         |                                                                                               |         | 16           | 42                     | 3                       |
| 40076    |         |                                                                                               |         | 5            | 7                      | 3                       |
| 40635    | +       | hydrophobin, partial [ <i>Trichoderma virens</i> Gv29-8]                                      | 1E-70   | 3            | 7                      | 1                       |
| 44387    |         |                                                                                               |         | 5            | 3                      | 4                       |
| 45164    |         | short-chain dehydrogenase [ <i>Colletotrichum higginsianum</i> ]                              | 9E-94   | 3            | 3                      | 0                       |
| 45768    |         | cytosine-purine permease [ <i>Trichoderma reesei</i> QM6a]                                    | 0       | 5            | 6                      | 1                       |
| 46411    |         | major facilitator superfamily transporter [ <i>Glomerella graminicola</i> M1.001]             | 0       | 3            | 5                      | 0                       |
| 47770    | +       | Na <sup>+</sup> /proline symporter [ <i>Trichoderma reesei</i> QM6a]                          | 0       | 5            | 5                      | 2                       |
| 48610    |         | major facilitator superfamily transporter [ <i>Glomerella graminicola</i> M1.001]             | 0       | 3            | 5                      | 3                       |
| 49894    |         | monooxygenase, putative [ <i>Aspergillus flavus</i> NRRL3357]                                 | 2E-101  | 2            | 3                      | 4                       |
| 51083    |         | ctr copper transporter family protein [ <i>Grosmannia clavigera</i> kw1407]                   | 1E-19   | 23           | 1.34E+02               | 1                       |
| 52534    |         | IQ calmodulin-binding motif protein [ <i>Metarhizium acridum</i> CQMa 102]                    | 0       | 1.87E+02     | 3.83E+02               | 1                       |
| 53370    |         | cytochrome P450, putative [ <i>Metarhizium anisopliae</i> ARSEF 23]                           | 2E-163  | 2            | 2                      | 1                       |
| 53581    |         |                                                                                               |         | 3            | 4                      | 0                       |

|        |   |                                                                                                                             |        |          |          |   |
|--------|---|-----------------------------------------------------------------------------------------------------------------------------|--------|----------|----------|---|
| 53582  |   |                                                                                                                             |        | 3        | 3        | 0 |
| 53730  |   |                                                                                                                             |        | 5        | 5        | 1 |
| 55803  |   | fatty acid oxygenase, putative [ <i>Metarhizium acridum</i> CQMa 102]                                                       | 0      | 3        | 5        | 1 |
| 55825  | + | cytochrome P450 monooxygenase [ <i>Metarhizium acridum</i> CQMa 102]                                                        | 0      | 3        | 3        | 2 |
| 58016  | + | MFS (Major Facilitator Superfamily) toxin efflux pump (AflT) [ <i>Metarhizium acridum</i> CQMa 102]                         | 0      | 2        | 2        | 2 |
| 58191  |   | peptide transporter [ <i>Trichoderma reesei</i> QM6a]                                                                       | 0      | 3        | 9        | 0 |
| 58255  |   | adenosine deaminase [ <i>Glomerella graminicola</i> M1.001]                                                                 | 0      | 3        | 5        | 0 |
| 58495  |   |                                                                                                                             |        | 5        | 4        | 1 |
| 59538  |   | short-chain dehydrogenase [ <i>Colletotrichum higginsianum</i> ]                                                            | 7E-97  | 8        | 11       | 1 |
| 62266  |   | LPS-induced tumor necrosis factor alpha factor [ <i>Cordyceps militaris</i> CM01]                                           | 2E-06  | 5        | 11       | 6 |
| 62665  |   | bifunctional catalase/peroxidase [ <i>Trichoderma reesei</i> QM6a]                                                          | 0      | 7        | 11       | 3 |
| 62760  |   |                                                                                                                             |        | 3.95E+02 | 1.04E+02 | 2 |
| 63496  | + | triose-phosphate transporter [ <i>Glomerella graminicola</i> M1.001]                                                        | 1E-142 | 2        | 3        | 5 |
| 64931  |   | pleiotropic drug resistance protein [ <i>Trichoderma atroviride</i> IMI 206040]                                             | 0      | 4        | 3        | 1 |
| 68271  | + | N-acetylglucosaminyl-phosphatidylinositol de-N-acetylase, a glycan biosynthesis protein [ <i>Trichoderma virens</i> Gv29-8] | 0      | 3        | 5        | 3 |
| 69429  |   | similar to ferric reductase like transmembrane component [ <i>Botryotinia fuckeliana</i> ]                                  | 2E-143 | 3        | 3        | 0 |
| 69432  |   | transmembrane amino acid transporter protein [ <i>Trichoderma reesei</i> QM6a]                                              | 0      | 30       | 36       | 1 |
| 71577  |   |                                                                                                                             |        | 4        | 4        | 2 |
| 72390  |   |                                                                                                                             |        | 4        | 4        | 1 |
| 72458  |   | multidrug resistance-associated protein [ <i>Trichoderma atroviride</i> IMI 206040]                                         | 0      | 3        | 3        | 1 |
| 75173  | + | gaba permease [ <i>Trichoderma reesei</i> QM6a]                                                                             | 0      | 2        | 3        | 1 |
| 77460  | + | hypothetical protein                                                                                                        |        | 4        | 4        | 0 |
| 78759  |   | major facilitator superfamily transporter [ <i>Glomerella graminicola</i> M1.001]                                           | 0      | 4        | 8        | 2 |
| 79145  |   |                                                                                                                             |        | 4        | 5        | 1 |
| 81869  | + | chitinase 3 [ <i>Coccidioides posadasii</i> ]                                                                               | 4E-14  | 5        | 6        | 2 |
| 81957  | + | xenobiotic compound monooxygenase [ <i>Magnaporthe oryzae</i> 70-15]                                                        | 0      | 9        | 7        | 1 |
| 82648  | + | tripeptidyl peptidase A [ <i>Neosartorya fischeri</i> NRRL 181]                                                             | 0      | 18       | 3.76E+02 | 1 |
| 83793  |   | ABC-transporter [ <i>Metarhizium anisopliae</i> ARSEF 23]                                                                   | 0      | 3        | 2        | 1 |
| 85675  |   | transmembrane amino acid transporter [ <i>Trichoderma reesei</i> QM6a]                                                      | 0      | 5        | 27       | 3 |
| 85743  |   | sulfite oxidase [ <i>Trichoderma reesei</i> QM6a]                                                                           | 0      | 4        | 3        | 1 |
| 86792  |   | cytochrome P450 [ <i>Glomerella graminicola</i> M1.001].                                                                    | 0      | 9        | 9        | 1 |
| 88246  |   | bleomycin hydrolase, putative [ <i>Metarhizium anisopliae</i> ARSEF 23]                                                     | 0      | 3        | 3        | 1 |
| 88285  |   | hydrolase, alpha/beta hydrolase fold family [ <i>Metarhizium anisopliae</i> ARSEF 23]                                       | 6E-88  | 7        | 9        | 2 |
| 89738  | + | Glycosyltransferase Family 32 protein                                                                                       | 0      | 8        | 26       | 2 |
| 89740  | + | Glycosyltransferase Family 32 protein                                                                                       | 0      | 6        | 18       | 3 |
| 92435  |   | alcohol dehydrogenase [ <i>Cordyceps militaris</i> CM01]                                                                    | 6E-180 | 5        | 8        | 0 |
| 111431 | + | hypothetical protein                                                                                                        |        | 2        | 3        | 1 |
| 111460 |   | hypothetical protein                                                                                                        |        | 3        | 2        | 0 |
