# Supplementary material for: PacC and pH–dependent transcriptome of the mycotrophic fungus Trichoderma virens
Source: PubMed Central journal article supplement (PMC3618310; doi:10.1186/1471-2164-14-138), 2013-02-28

## Additional file 12 - Disruption of *pacC* by homologous integration.

The diagram shows the scheme used for replacement of the entire *pacC* coding sequence. HYG indicates selectable marker cassette (for full details, see Methods, main text).

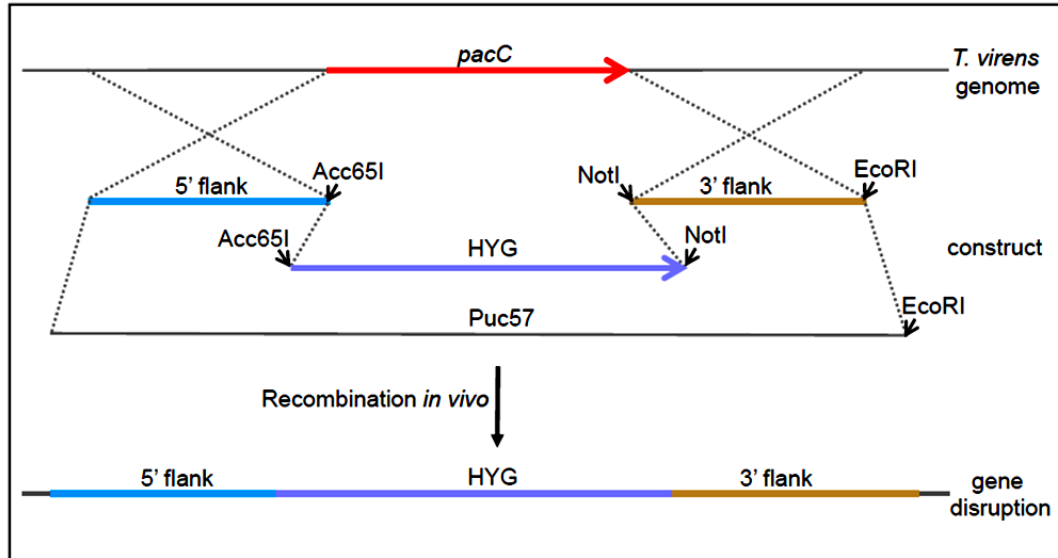

Supplement: 1471-2164-14-138-S11.pdf [file 1471-2164-14-138-S11.pdf]
