# Supplementary material for: PacC and pH–dependent transcriptome of the mycotrophic fungus Trichoderma virens
Source: PubMed Central journal article supplement (PMC3618310; doi:10.1186/1471-2164-14-138), 2013-02-28
Supplement: 1471-2164-14-138-S12.pdf [file 1471-2164-14-138-S12.pdf]

## Additional file 13 - Primers for gene knock-out

Sequences and names of the primers used for knock-out of *pacC* and confirmation of the integration event are given.

| Pairs                                    | Primer           | Sequence                    |
|------------------------------------------|------------------|-----------------------------|
| <b><u><i>ΔpacC</i></u></b>               |                  |                             |
| <b>Pair 1</b>                            | PacC 3' flank as | CCATGTATTATTGAATTCAAACCTCGG |
|                                          | PacC 3' flank s  | AAGTCCAGGCGGCCGCTTGC        |
| <b>Pair 2</b>                            | PacC 5' flank as | GTACCCATCCGTCATCACTTACAT    |
|                                          | PacC 5' flank s  | TGCATATTCGCCAGCTCTATACG     |
| <b><i>pacC</i> deletion confirmation</b> | 195_PacC_5`OTFs  | TCCTCCCTAGTCCATGGTATCGG     |
|                                          | 196_PacC_3`OTFas | GCTCCATCGATGTCAACACTGTG     |
|                                          | 193_PacC_s       | CGCCTCACCTACAGATGCTTCG      |
|                                          | 194_PacC_as      | GCTTGTGGTCTGTAGTTCATGCCG    |
