# Supplementary material for: PacC and pH–dependent transcriptome of the mycotrophic fungus Trichoderma virens
Source: PubMed Central journal article supplement (PMC3618310; doi:10.1186/1471-2164-14-138), 2013-02-28
Supplement: 1471-2164-14-138-S13.pdf [file 1471-2164-14-138-S13.pdf]

## Additional file 14 - Primers for split-marker gene replacement strategy.

Lower case indicates sequences that are not complementary to the template in the first PCR step. In the second PCR step, these sequences, which are complementary to the ends of the selectable marker, allow joining of the fragments.

| Pairs       | Primer                | Sequence                                     |
|-------------|-----------------------|----------------------------------------------|
| <i>pacC</i> |                       |                                              |
| Pair 1      | FP1PacC <sup>c</sup>  | CAACCCGGCATGAACTACAG                         |
|             | RP1PacC <sup>c</sup>  | tcctgtgtaaattgttatccgctTTAGACAGATCGTGCGGTGCA |
| Pair 2      | FP2PacC <sup>c</sup>  | gtcgtgactgggaaaacGATGTTTGTGTATGAGGTGGC       |
|             | RP2PacC <sup>c</sup>  | GGGAAGACCGAAAATGAAGAG                        |
| Pair 3      | M13Rhyg               | AGCGGATAACAATTCACACAGGA                      |
|             | NLC37                 | GGATGCCTCCGCTCGAAGTA                         |
| Pair 4      | M13Fhyg               | CGCCAGGGTTTTCCAGTCACGAC                      |
|             | NLC38                 | CGTTGCAAGACCTGCCTGAA                         |
| Pair 5      | 71                    | GCGCTTGCGTAATCATGGTC                         |
|             | pacC_gene_s           | GACTTTTCTGCTGCCCCACCACGAC                    |
| Pair 6      | TtrpCend <sup>l</sup> | GTGAATGCTCCGTAACACCCAATAC                    |
|             | pacC_gene_as          | CGAGACGGCGGCAAACGAAAGCG                      |
|             | 79_pacCc_check_s      | AAGGCAAGCGAATCCACTCC                         |
|             | 80_pacCc_check_as     | GTACCAGGAACAGGCAGGACG                        |
